# Supplementary material
Source: bioRxiv or medRxiv preprint supplement (https://www.biorxiv.org/highwire/filestream/101088/field_highwire_adjunct_files/14/324509-7.pdf)

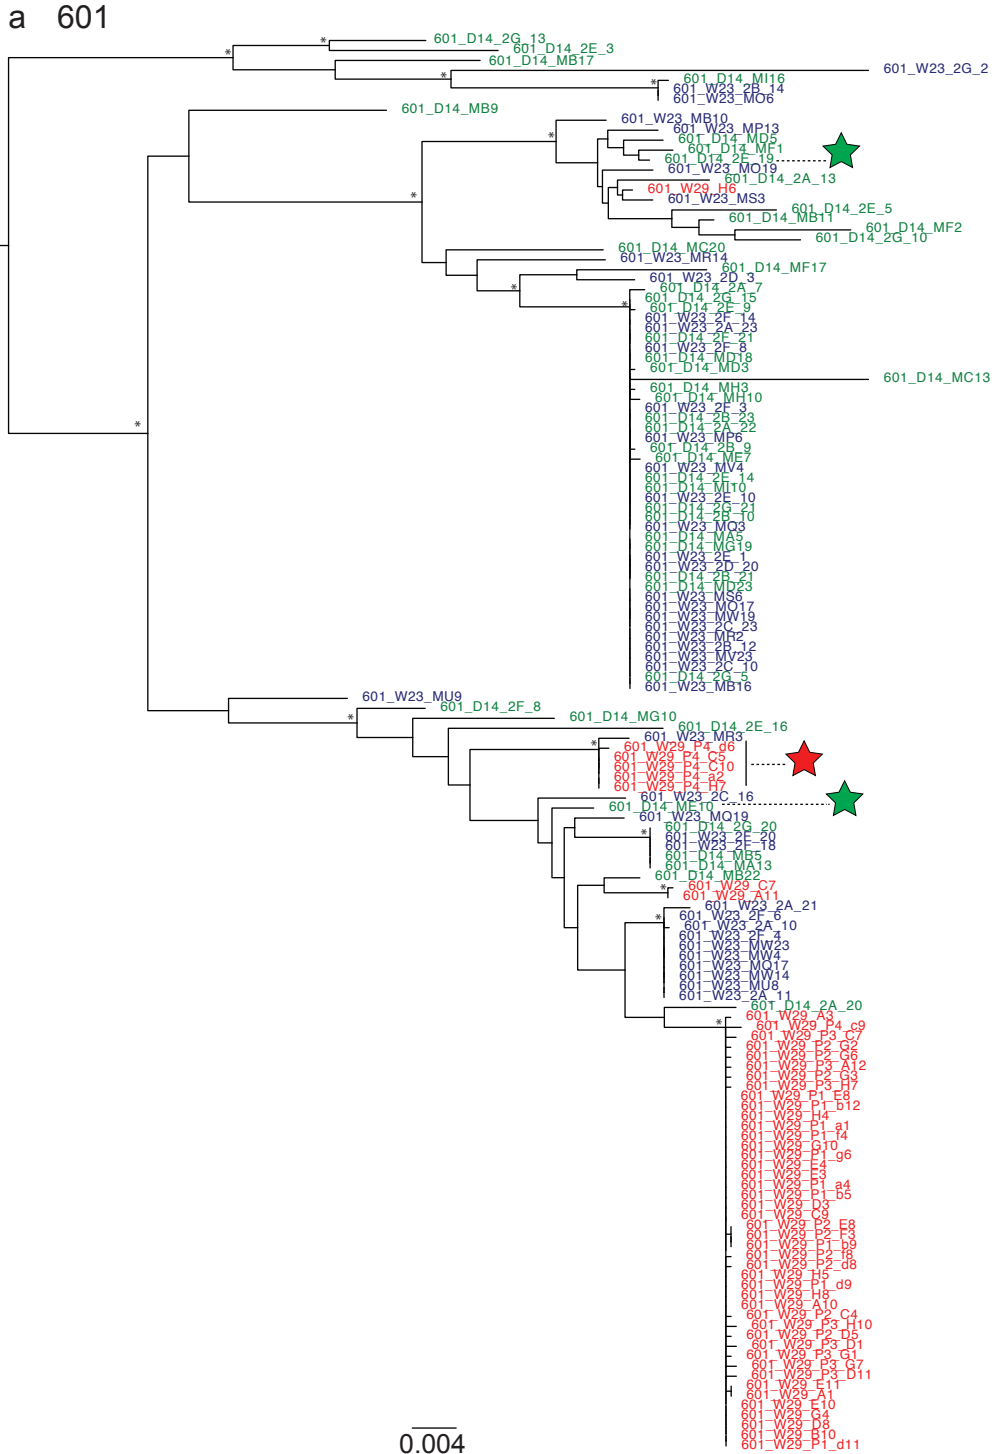

**Supplementary Figure 7. Maximum likelihood phylogenetic trees of full-length *env* sequences from Q<sup>2</sup>VOA cultures, rebound SGA, and near full-length genome (NFL).** Viruses from week -2 are represented in green, from week 23 in blue, rebound SGA in red, and from NFL in purple. Asterisks indicate nodes with significant bootstrap values (bootstrap support  $\geq 90\%$ ). Green stars represent the recombinant parents and red stars represent the child recombinant for the examples shown in Fig. 5b.

Supplementary Figure 7 continued.

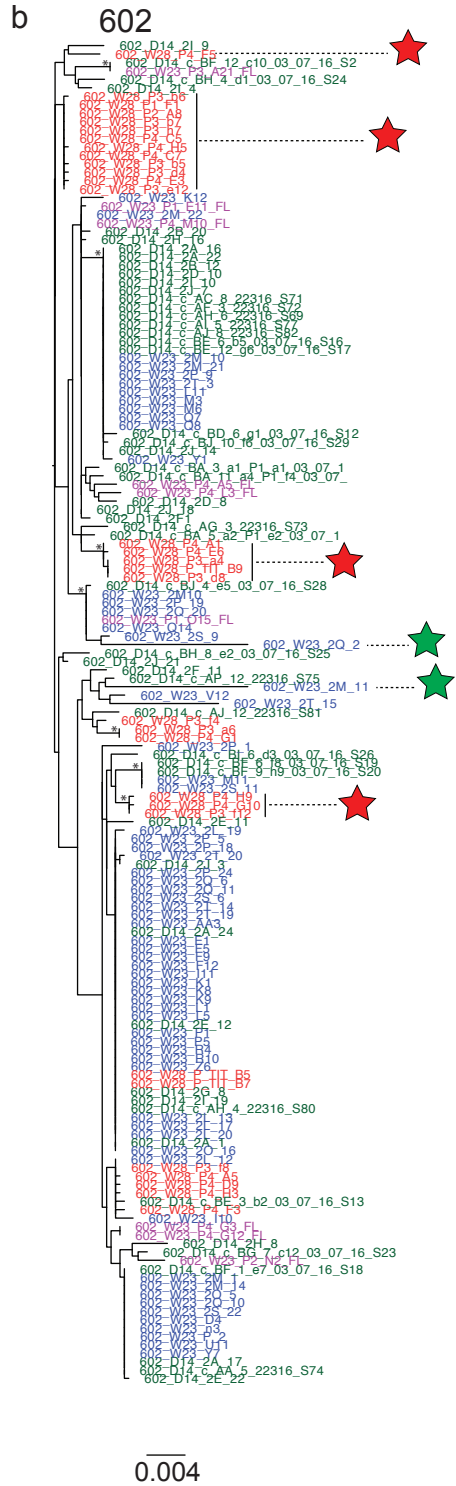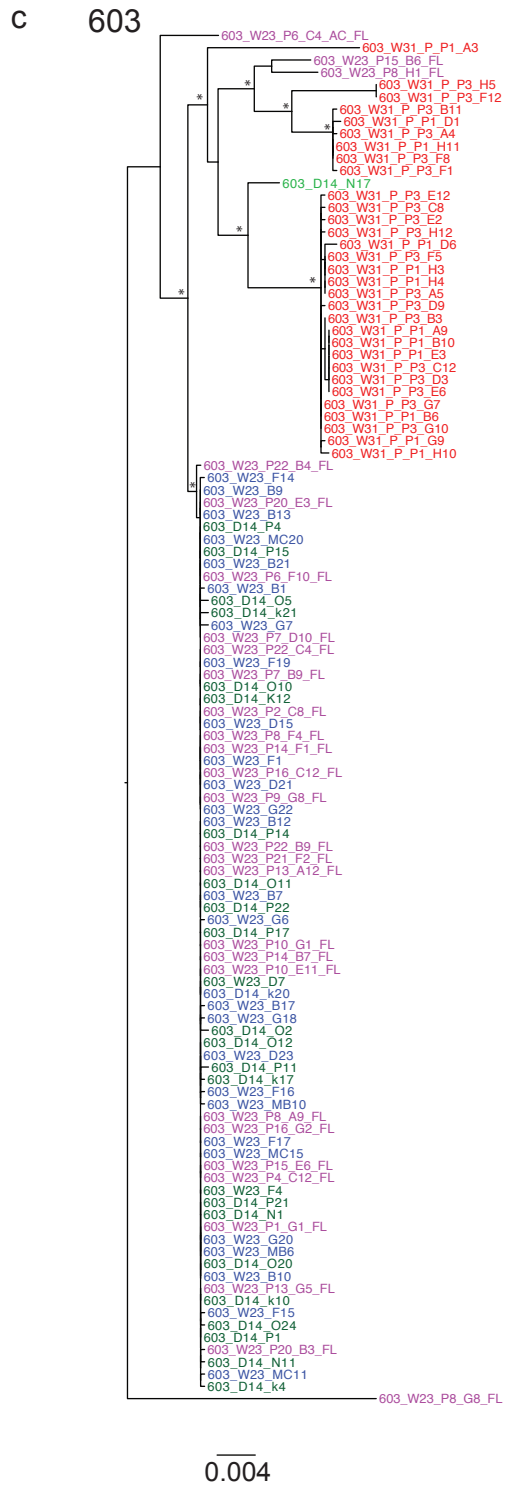

Supplementary Figure 7 continued.

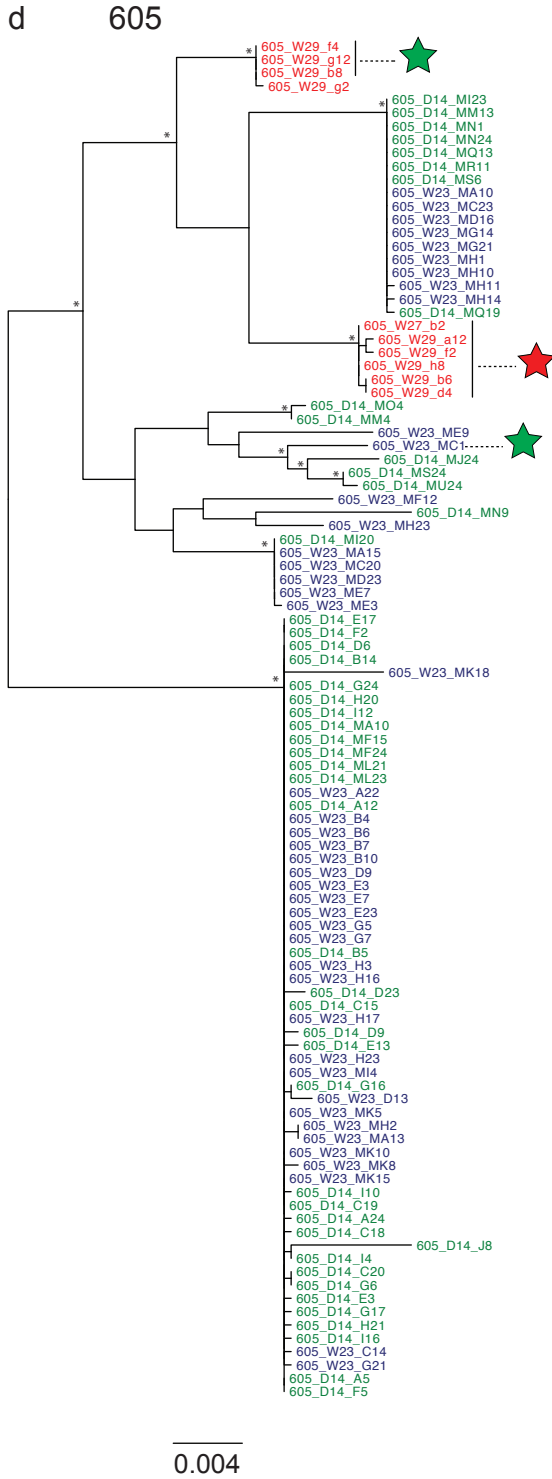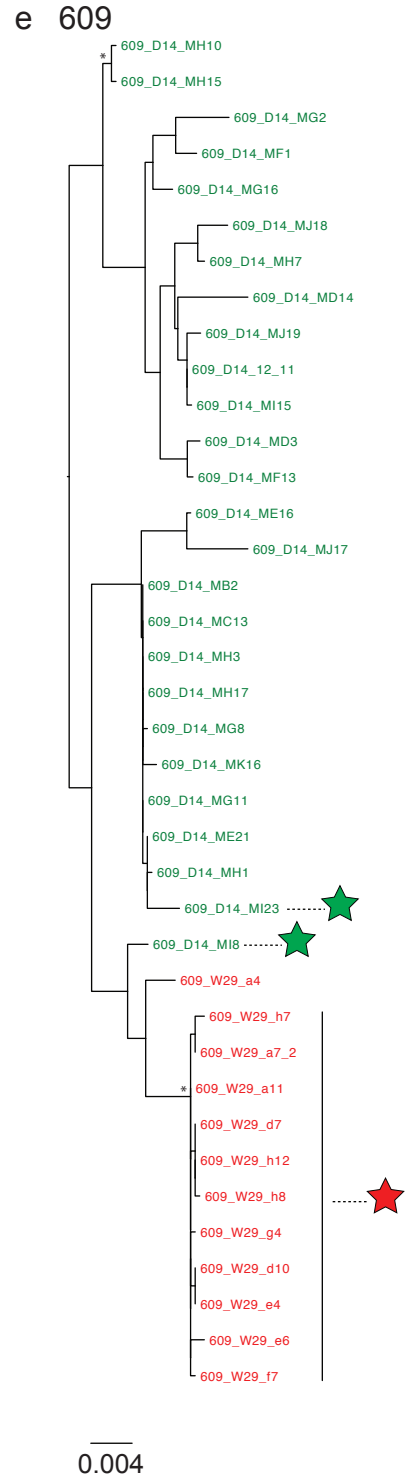

Supplementary Figure 7 continued.

f 608

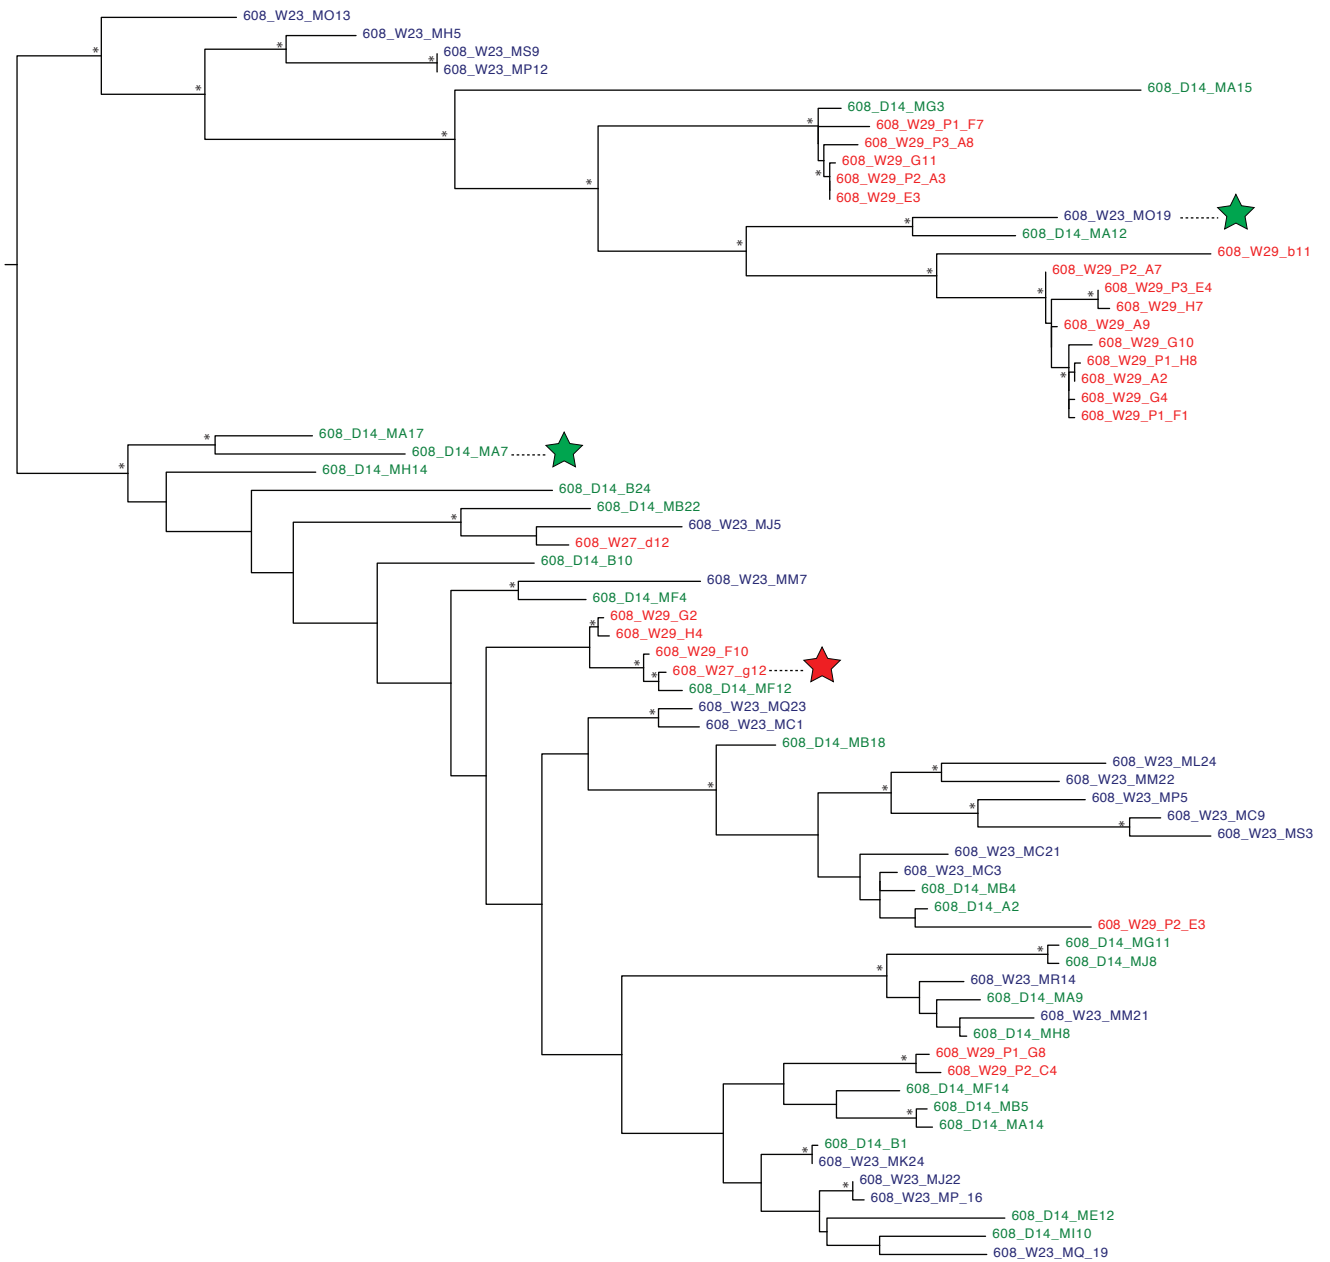

0.004

Supplementary Figure 7 continued.

g

611

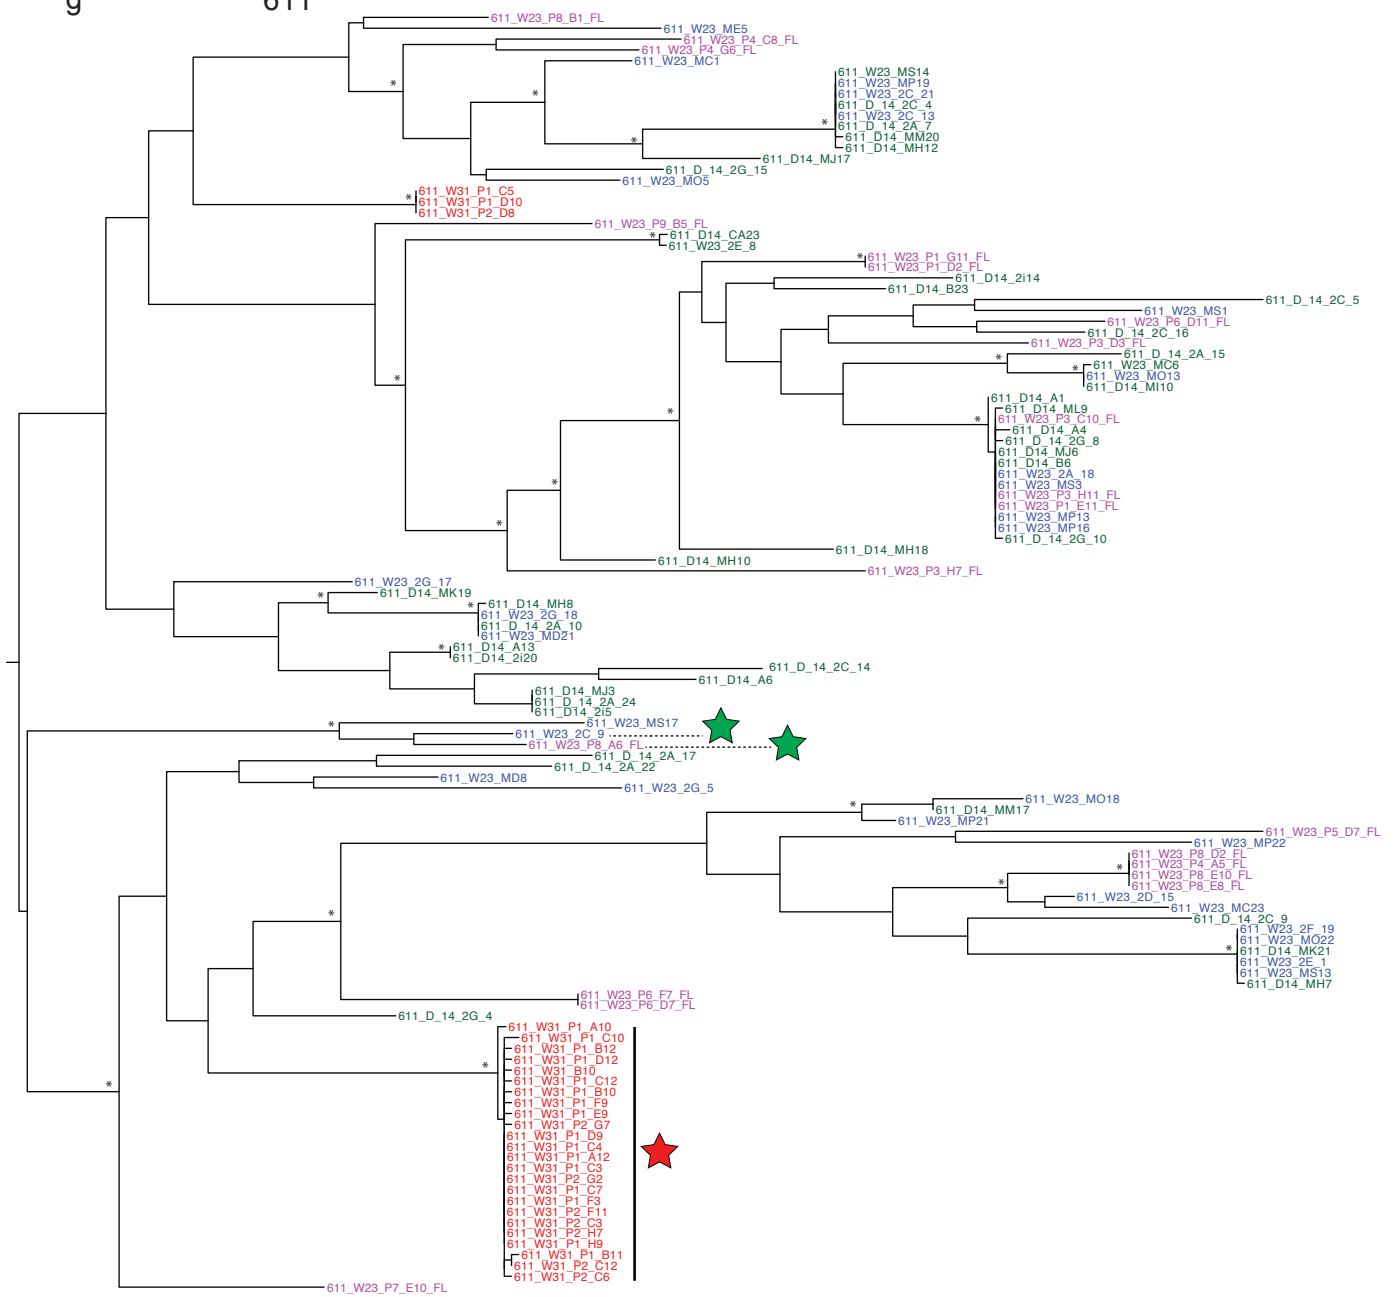

0.004

Supplementary Figure 7 continued.

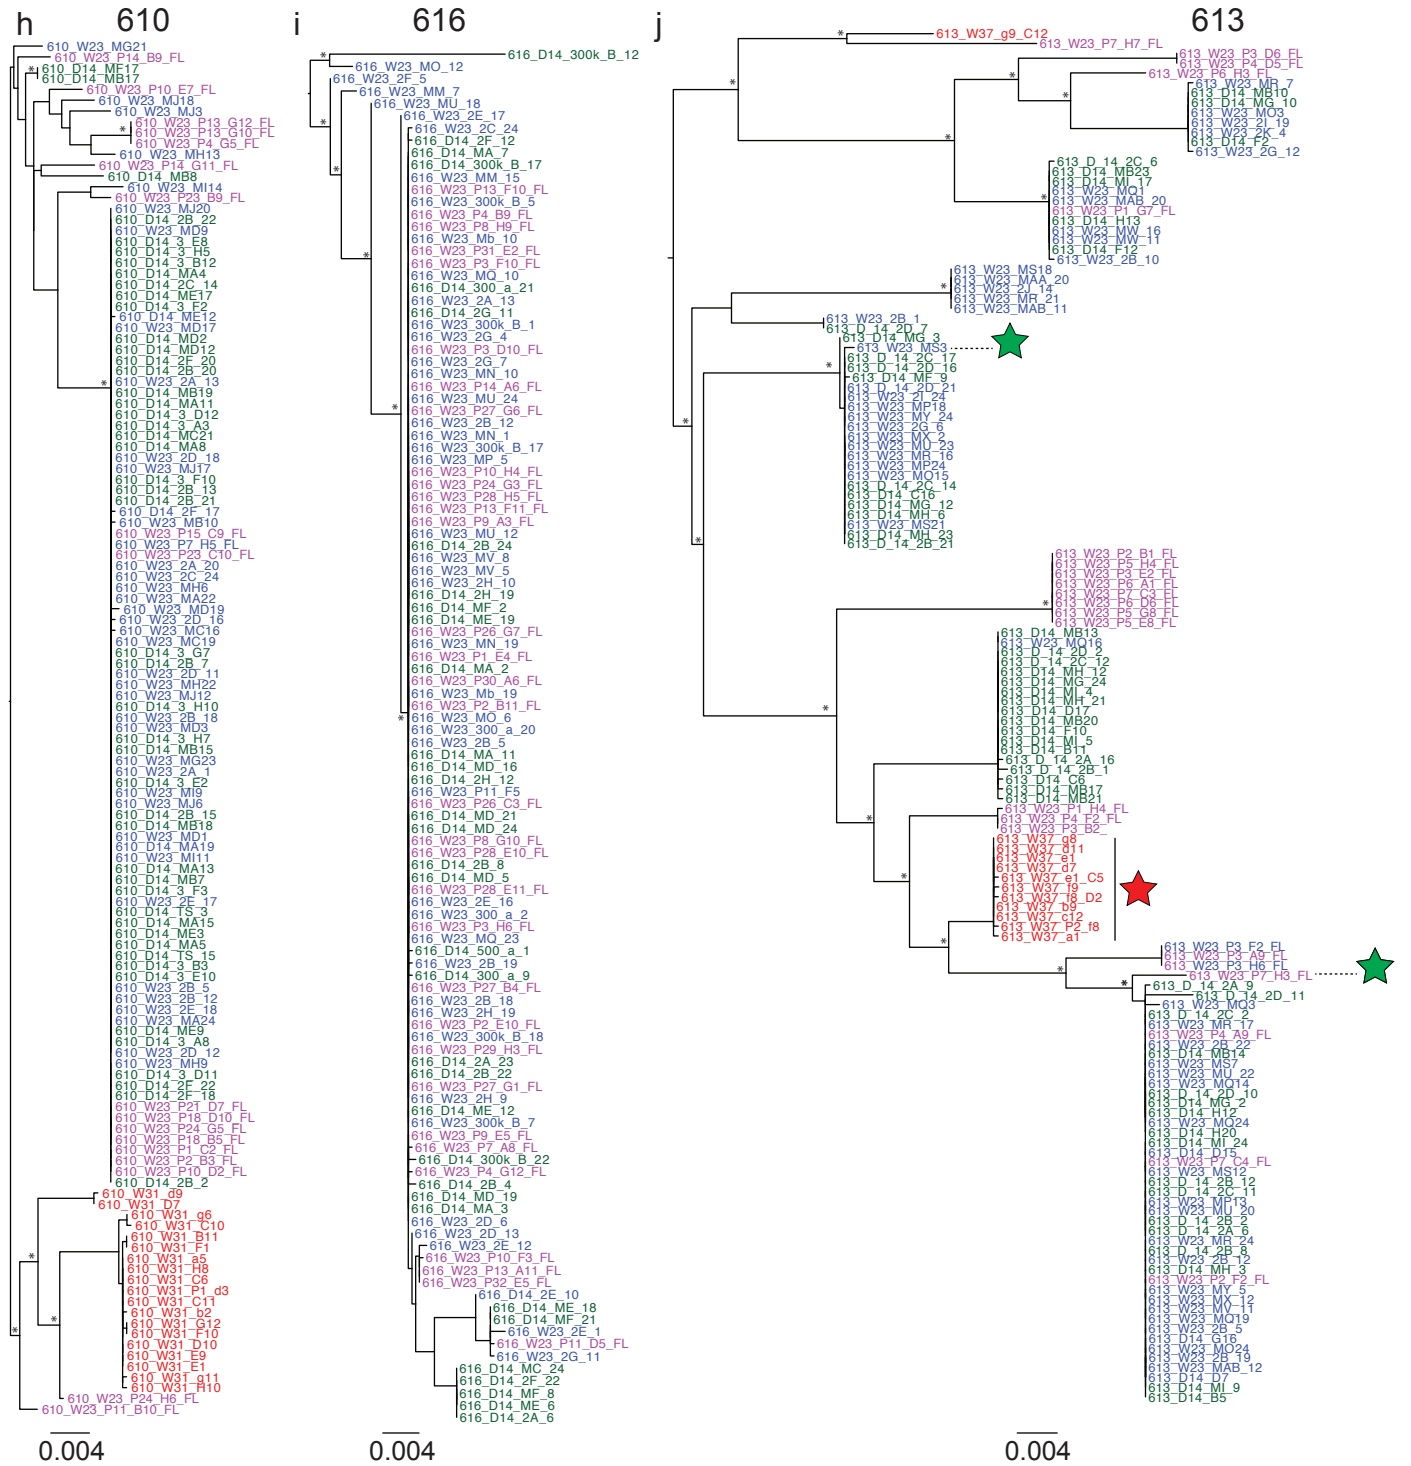

Supplement: Supplementary file [file 324509-7.pdf]
